# Supplementary material for: Combination immunotherapy induces distinct T-cell repertoire responses when administered to patients with different malignancies
Source: PubMed Central journal article supplement — J Immunother Cancer. 2020 May 5;8(1):e000368. doi: 10.1136/jitc-2019-000368 (PMC7223469; doi:10.1136/jitc-2019-000368), 2020-05-05
Supplement: jitc-2019-000368supp002.pdf [file jitc-2019-000368supp002.pdf]

Supplementary Table 1: Tabulation of Samples from the mCRPC Study

| Patient ID | Flow Cytometry |        | TCGA Sequencing |        |
|------------|----------------|--------|-----------------|--------|
|            | Week 0         | Week 2 | Week 0          | Week 2 |
| 02558-03   |                |        |                 | x      |
| 02558-05   |                |        |                 | x      |
| 02558-06   |                |        |                 | x      |
| 02558-07   |                |        | x               | x      |
| 02558-08   |                |        | x               | x      |
| 02558-09   |                |        | x               | x      |
| 02558-10   |                |        |                 | x      |
| 02558-11   |                |        | x               | x      |
| 02558-12   |                |        | x               | x      |
| 02558-13   |                |        |                 | x      |
| 02558-14   |                |        | x               | x      |
| 02558-16   |                |        |                 | x      |
| 02558-17   |                |        |                 | x      |
| 02558-18   |                |        | x               | x      |
| 02558-19   | x              | x      | x               | x      |
| 02558-20   |                |        | x               | x      |
| 02558-21   | x              |        |                 |        |
| 02558-22   | x              | x      |                 |        |
| 02558-23   | x              | x      | x               | x      |
| 02558-24   |                |        | x               | x      |
| 02558-25   | x              |        | x               | x      |
| 02558-26   | x              | x      | x               | x      |
| 02558-27   | x              |        | x               | x      |
| 02558-28   | x              | x      |                 | x      |
| 02558-29   | x              |        | x               | x      |
| 02558-30   | x              |        | x               | x      |
| 02558-31   | x              | x      | x               | x      |
| 02558-33   | x              |        | x               | x      |
| 02558-34   | x              | x      |                 | x      |
| 02558-35   | x              | x      | x               | x      |
| 02558-36   | x              | x      | x               | x      |
| 02558-37   | x              | x      |                 | x      |
| 02558-38   |                |        |                 | x      |
| 02558-39   | x              | x      | x               | x      |
| 02558-40   | x              | x      | x               | x      |
| 02558-41   | x              | x      | x               | x      |
| 02558-42   | x              | x      | x               | x      |
| Totals     | 20             | 16     | 22              | 35     |

\* Sample was present and included in the analysis.

Supplementary Table 1: Tabulation of Samples from the mCRPC Study

| Patient ID | Flow Cytometry |        | TCGA Sequencing |        |
|------------|----------------|--------|-----------------|--------|
|            | Week 0         | Week 2 | Week 0          | Week 2 |
| 02558-03   |                |        |                 | x      |
| 02558-05   |                |        |                 | x      |
| 02558-06   |                |        |                 | x      |
| 02558-07   |                |        | x               | x      |
| 02558-08   |                |        | x               | x      |
| 02558-09   |                |        | x               | x      |
| 02558-10   |                |        |                 | x      |
| 02558-11   |                |        | x               | x      |
| 02558-12   |                |        | x               | x      |
| 02558-13   |                |        |                 | x      |
| 02558-14   |                |        | x               | x      |
| 02558-16   |                |        |                 | x      |
| 02558-17   |                |        |                 | x      |
| 02558-18   |                |        | x               | x      |
| 02558-19   | x              | x      | x               | x      |
| 02558-20   |                |        | x               | x      |
| 02558-21   | x              |        |                 |        |
| 02558-22   | x              | x      |                 |        |
| 02558-23   | x              | x      | x               | x      |
| 02558-24   |                |        | x               | x      |
| 02558-25   | x              |        | x               | x      |
| 02558-26   | x              | x      | x               | x      |
| 02558-27   | x              |        | x               | x      |
| 02558-28   | x              | x      |                 | x      |
| 02558-29   | x              |        | x               | x      |
| 02558-30   | x              |        | x               | x      |
| 02558-31   | x              | x      | x               | x      |
| 02558-33   | x              |        | x               | x      |
| 02558-34   | x              | x      |                 | x      |
| 02558-35   | x              | x      | x               | x      |
| 02558-36   | x              | x      | x               | x      |
| 02558-37   | x              | x      |                 | x      |
| 02558-38   |                |        |                 | x      |
| 02558-39   | x              | x      | x               | x      |
| 02558-40   | x              | x      | x               | x      |
| 02558-41   | x              | x      | x               | x      |
| 02558-42   | x              | x      | x               | x      |
| Totals     | 20             | 16     | 22              | 35     |

\* Sample was present and included in the analysis.

Supplementary Table 1: Tabulation of Samples from the mCRPC Study

| Patient ID | Flow Cytometry |        | TCGA Sequencing |        |
|------------|----------------|--------|-----------------|--------|
|            | Week 0         | Week 2 | Week 0          | Week 2 |
| 02558-03   |                |        |                 | x      |
| 02558-05   |                |        |                 | x      |
| 02558-06   |                |        |                 | x      |
| 02558-07   |                |        | x               | x      |
| 02558-08   |                |        | x               | x      |
| 02558-09   |                |        | x               | x      |
| 02558-10   |                |        |                 | x      |
| 02558-11   |                |        | x               | x      |
| 02558-12   |                |        | x               | x      |
| 02558-13   |                |        |                 | x      |
| 02558-14   |                |        | x               | x      |
| 02558-16   |                |        |                 | x      |
| 02558-17   |                |        |                 | x      |
| 02558-18   |                |        | x               | x      |
| 02558-19   | x              | x      | x               | x      |
| 02558-20   |                |        | x               | x      |
| 02558-21   | x              |        |                 |        |
| 02558-22   | x              | x      |                 |        |
| 02558-23   | x              | x      | x               | x      |
| 02558-24   |                |        | x               | x      |
| 02558-25   | x              |        | x               | x      |
| 02558-26   | x              | x      | x               | x      |
| 02558-27   | x              |        | x               | x      |
| 02558-28   | x              | x      |                 | x      |
| 02558-29   | x              |        | x               | x      |
| 02558-30   | x              |        | x               | x      |
| 02558-31   | x              | x      | x               | x      |
| 02558-33   | x              |        | x               | x      |
| 02558-34   | x              | x      |                 | x      |
| 02558-35   | x              | x      | x               | x      |
| 02558-36   | x              | x      | x               | x      |
| 02558-37   | x              | x      |                 | x      |
| 02558-38   |                |        |                 | x      |
| 02558-39   | x              | x      | x               | x      |
| 02558-40   | x              | x      | x               | x      |
| 02558-41   | x              | x      | x               | x      |
| 02558-42   | x              | x      | x               | x      |
| Totals     | 20             | 16     | 22              | 35     |

\* Sample was present and included in the analysis.
