# Supplementary figures and images for: Combination immunotherapy induces distinct T-cell repertoire responses when administered to patients with different malignancies
Source: PubMed Central journal article supplement — J Immunother Cancer. 2020 May 5;8(1):e000368. doi: 10.1136/jitc-2019-000368 (PMC7223469; doi:10.1136/jitc-2019-000368), 2020-05-05

Supplementary Figure 2

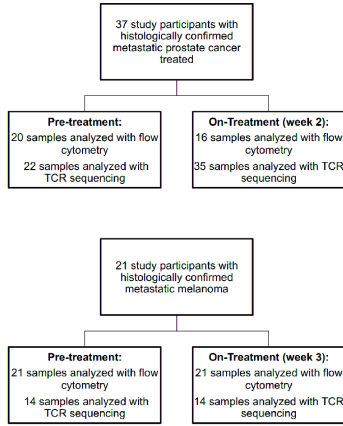

Supplementary Figure 2

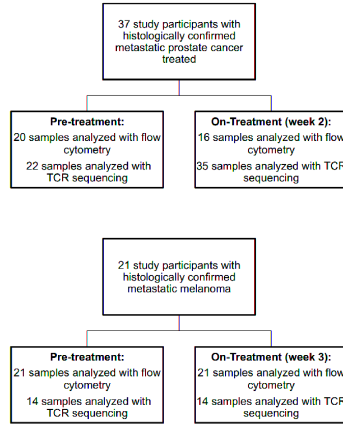

Supplementary Figure 2

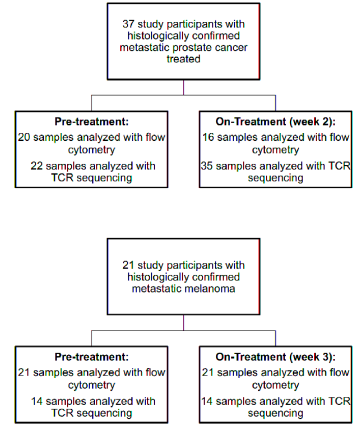

Supplement: jitc-2019-000368supp001.pdf [file jitc-2019-000368supp001.pdf]

**Supplementary Figure 1.** Gating strategy for immune cells acquired by flow cytometry.

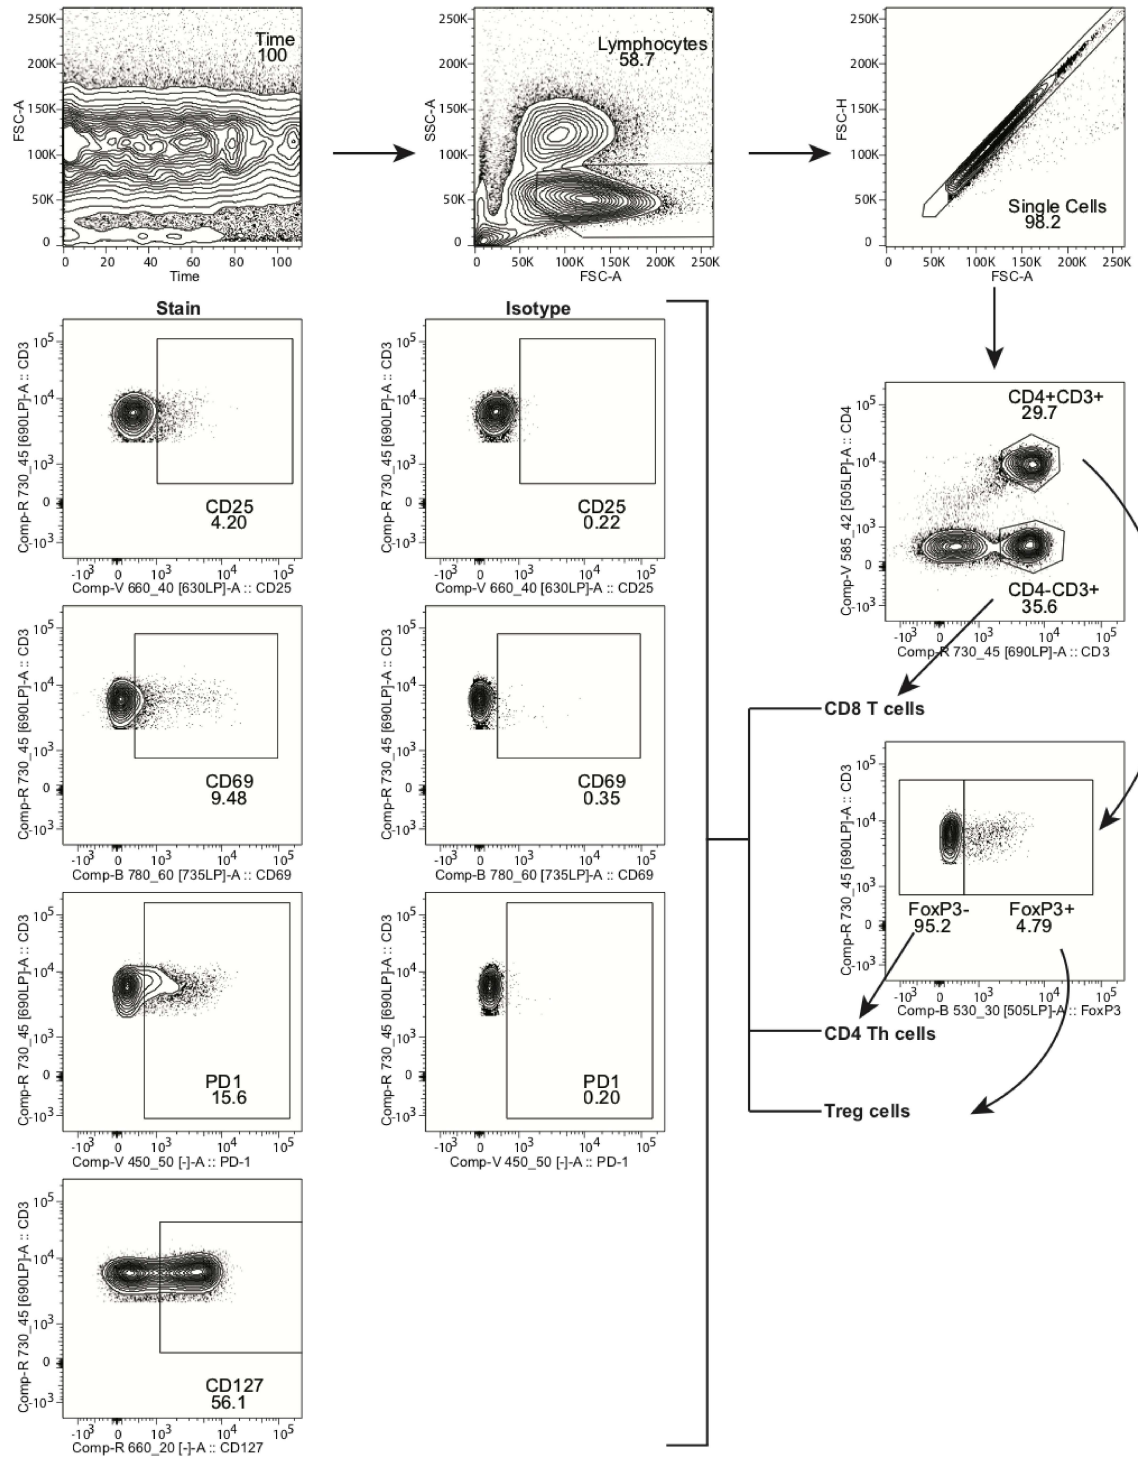

Supplement: jitc-2019-000368supp004.pdf [file jitc-2019-000368supp004.pdf]
